# Supplementary material
Source: PubMed Central journal article supplement (PMC3137214)
Supplement: supp_btr324_SampleSeqBioinformatics_rev_supp.pdf [file supp_btr324_SampleSeqBioinformatics_rev_supp.pdf]

# Enriching Targeted Sequencing Experiments for Rare Disease Alleles

Todd L. Edwards<sup>1</sup>, Zhuo Song<sup>2,3</sup>, and Chun Li<sup>2,4,\*</sup>

<sup>1</sup>Vanderbilt Epidemiology Center, Division of Epidemiology, Vanderbilt University, Nashville, TN 37203

<sup>2</sup>Center for Human Genetics Research, <sup>3</sup>Department of Molecular Physiology and Biophysics, <sup>4</sup>Department of Biostatistics, Vanderbilt University, Nashville, TN 37212

Associate Editor:

## SUPPLEMENTARY MATERIALS

**Table 1.** (CDRV) Ratio of average counts of disease alleles captured to the average maximum possible disease alleles (percent change relative to SampleSeq).  $K=0.01$ , assuming  $p_d=0.01$  in calculation of  $E_{ik}$

| Size | Sample-Seq | Case Burden | Proxy Burden | Random Cases | Random Controls |
|------|------------|-------------|--------------|--------------|-----------------|
| 50   | 0.31       | 0.31(-0.61) | 0.19(-38.2)  | 0.15(-51.43) | 0.04(-86.93)    |
| 100  | 0.33       | 0.33(0.52)  | 0.21(-35.34) | 0.17(-47.78) | 0.05(-85.95)    |
| 150  | 0.37       | 0.37(-0.11) | 0.25(-32.41) | 0.2(-45.43)  | 0.05(-85.32)    |
| 200  | 0.40       | 0.39(-1.33) | 0.27(-32.96) | 0.22(-43.67) | 0.06(-84.84)    |
| 250  | 0.41       | 0.4(-1.98)  | 0.27(-34.4)  | 0.24(-42.16) | 0.06(-84.44)    |
| 300  | 0.42       | 0.41(-2.56) | 0.27(-34.99) | 0.25(-40.86) | 0.07(-84.09)    |
| 350  | 0.43       | 0.41(-2.93) | 0.28(-34.99) | 0.26(-39.69) | 0.07(-83.77)    |
| 400  | 0.43       | 0.41(-3.46) | 0.28(-34.77) | 0.26(-38.53) | 0.07(-83.46)    |
| 450  | 0.43       | 0.41(-3.65) | 0.28(-34.25) | 0.27(-37.44) | 0.07(-83.16)    |
| 500  | 0.43       | 0.41(-4.06) | 0.28(-34.03) | 0.27(-36.68) | 0.07(-82.96)    |

**Table 2.** (CDRV) Ratio of average counts of disease alleles captured to the average maximum possible disease alleles (percent change relative to SampleSeq).  $K=0.05$ , assuming  $p_d=0.01$  in calculation of  $E_{ik}$

| Size | Sample-Seq | Case burden | Proxy burden | Random cases | Random controls |
|------|------------|-------------|--------------|--------------|-----------------|
| 50   | 0.28       | 0.27(-2.7)  | 0.17(-41.18) | 0.13(-53.6)  | 0.04(-87.09)    |
| 100  | 0.34       | 0.33(-3.35) | 0.22(-34.89) | 0.17(-49.94) | 0.05(-86.07)    |
| 150  | 0.37       | 0.35(-4.96) | 0.23(-36.96) | 0.19(-48.25) | 0.05(-85.6)     |
| 200  | 0.38       | 0.36(-4.6)  | 0.24(-37.13) | 0.2(-45.65)  | 0.06(-84.87)    |
| 250  | 0.38       | 0.36(-3.9)  | 0.24(-37.21) | 0.21(-43.84) | 0.06(-84.37)    |
| 300  | 0.38       | 0.36(-4.06) | 0.24(-35.75) | 0.22(-42.16) | 0.06(-83.9)     |
| 350  | 0.38       | 0.36(-4.71) | 0.25(-34.44) | 0.22(-41.07) | 0.06(-83.6)     |
| 400  | 0.38       | 0.36(-4.44) | 0.25(-34.11) | 0.23(-39.82) | 0.06(-83.25)    |
| 450  | 0.38       | 0.36(-5.33) | 0.25(-34.21) | 0.23(-38.95) | 0.06(-83.01)    |
| 500  | 0.37       | 0.35(-5.03) | 0.24(-34.27) | 0.23(-37.72) | 0.06(-82.67)    |

**Table 3.** (CDRV) Ratio of average counts of disease alleles captured to the average maximum possible disease alleles (percent change relative to SampleSeq).  $K=0.1$ , assuming  $p_d=0.01$  in calculation of  $E_{ik}$

| Size | Sample-Seq | Case Burden | Proxy Burden | Random Cases | Random Controls |
|------|------------|-------------|--------------|--------------|-----------------|
| 50   | 0.24       | 0.24(-0.41) | 0.14(-42.71) | 0.13(-43.79) | 0.03(-86.22)    |
| 100  | 0.27       | 0.26(-0.83) | 0.16(-41.74) | 0.16(-41.02) | 0.04(-85.54)    |
| 150  | 0.27       | 0.27(-2.04) | 0.16(-39.88) | 0.17(-38.98) | 0.04(-85.04)    |
| 200  | 0.28       | 0.27(-1.68) | 0.16(-40.3)  | 0.17(-37.46) | 0.04(-84.67)    |
| 250  | 0.28       | 0.27(-2.33) | 0.16(-40.49) | 0.18(-36.29) | 0.04(-84.38)    |
| 300  | 0.28       | 0.27(-2.76) | 0.16(-41.03) | 0.18(-35.44) | 0.04(-84.17)    |
| 350  | 0.28       | 0.27(-3.59) | 0.16(-40.24) | 0.18(-34.51) | 0.04(-83.94)    |
| 400  | 0.27       | 0.26(-3.53) | 0.16(-39.47) | 0.18(-33.18) | 0.04(-83.62)    |
| 450  | 0.27       | 0.26(-4.08) | 0.17(-38.85) | 0.18(-32.41) | 0.05(-83.43)    |
| 500  | 0.29       | 0.28(-3.64) | 0.18(-37.29) | 0.2(-31.05)  | 0.05(-83.1)     |

**Table 4.** (CDRV) Ratio of average counts of disease alleles captured to the average maximum possible disease alleles (percent change relative to SampleSeq).  $K=0.2$ , assuming  $p_d=0.01$  in calculation of  $E_{ik}$

| Size | Sample-Seq | Case Burden | Proxy Burden | Random Cases | Random Controls |
|------|------------|-------------|--------------|--------------|-----------------|
| 50   | 0.20       | 0.2(3.01)   | 0.11(-43.57) | 0.13(-35.88) | 0.03(-83.38)    |
| 100  | 0.22       | 0.22(0.76)  | 0.13(-43.18) | 0.15(-35.05) | 0.04(-83.16)    |
| 150  | 0.23       | 0.23(-0.81) | 0.14(-40.73) | 0.15(-33.51) | 0.04(-82.76)    |
| 200  | 0.23       | 0.23(-0.16) | 0.14(-40.1)  | 0.16(-31.34) | 0.04(-82.2)     |
| 250  | 0.23       | 0.23(-0.92) | 0.14(-38.93) | 0.16(-30.15) | 0.04(-81.89)    |
| 300  | 0.23       | 0.22(-2.06) | 0.14(-39.29) | 0.16(-29.22) | 0.04(-81.65)    |
| 350  | 0.23       | 0.22(-2.56) | 0.14(-39.07) | 0.16(-28.4)  | 0.04(-81.44)    |
| 400  | 0.23       | 0.22(-2.53) | 0.14(-38.59) | 0.16(-27.55) | 0.04(-81.22)    |
| 450  | 0.24       | 0.24(-2.09) | 0.15(-38.03) | 0.18(-26.61) | 0.05(-80.98)    |
| 500  | 0.27       | 0.26(-2.01) | 0.17(-37.42) | 0.2(-25.69)  | 0.05(-80.74)    |

**Table 5.** (SA) Ratio of average counts of disease alleles captured to the average maximum possible disease alleles (percent change relative to SampleSeq).  $K=0.01$ , assuming  $p_d=0.01$  in calculation of  $E_{ik}$ .

| Size | Sample-Seq | Case Burden | Proxy Burden | Random Cases | Random Controls |
|------|------------|-------------|--------------|--------------|-----------------|
| 50   | 0.66       | 0.66(-0.11) | 0.54(-18.58) | 0.63(-4.95)  | 0.14(-78.65)    |
| 100  | 0.69       | 0.69(-0.08) | 0.54(-21.58) | 0.65(-4.58)  | 0.15(-78.57)    |
| 150  | 0.72       | 0.72(-0.18) | 0.58(-19.79) | 0.69(-4.3)   | 0.15(-78.51)    |
| 200  | 0.74       | 0.74(-0.33) | 0.59(-20.4)  | 0.71(-4.08)  | 0.16(-78.46)    |
| 250  | 0.76       | 0.75(-0.4)  | 0.58(-22.8)  | 0.73(-3.88)  | 0.16(-78.41)    |
| 300  | 0.77       | 0.76(-0.28) | 0.57(-25.03) | 0.74(-3.69)  | 0.17(-78.37)    |
| 350  | 0.77       | 0.77(-0.31) | 0.58(-25.22) | 0.75(-3.52)  | 0.17(-78.33)    |
| 400  | 0.78       | 0.78(-0.26) | 0.59(-24.47) | 0.76(-3.32)  | 0.17(-78.29)    |
| 450  | 0.80       | 0.8(-0.21)  | 0.61(-23.69) | 0.78(-3.15)  | 0.17(-78.25)    |
| 500  | 0.82       | 0.81(-0.32) | 0.62(-23.58) | 0.79(-3.08)  | 0.18(-78.23)    |

**Table 6.** (CDCV) Ratio of average counts of disease alleles captured to the average maximum possible disease alleles (percent change relative to SampleSeq).  $K=0.01$ , assuming  $p_d=0.01$  in calculation of  $E_{ik}$ .

| Size | Sample-Seq | Case Burden | Proxy Burden | Random Cases | Random Controls |
|------|------------|-------------|--------------|--------------|-----------------|
| 50   | 0.9        | 0.9(-0.13)  | 0.91(1.22)   | 0.48(-46.88) | 0.4(-55.27)     |
| 100  | 0.91       | 0.92(0.26)  | 0.93(1.82)   | 0.51(-43.86) | 0.43(-52.72)    |
| 150  | 0.91       | 0.91(-0.18) | 0.94(2.45)   | 0.53(-41.74) | 0.45(-50.94)    |
| 200  | 0.91       | 0.9(-0.92)  | 0.93(2.13)   | 0.54(-40.22) | 0.46(-49.66)    |
| 250  | 0.9        | 0.89(-1.35) | 0.92(1.57)   | 0.55(-39.06) | 0.46(-48.68)    |
| 300  | 0.91       | 0.9(-1.66)  | 0.92(1.21)   | 0.57(-38.06) | 0.48(-47.84)    |
| 350  | 0.92       | 0.9(-1.95)  | 0.93(1.28)   | 0.58(-37.04) | 0.49(-46.98)    |
| 400  | 0.93       | 0.91(-2.48) | 0.94(1.41)   | 0.59(-36.13) | 0.5(-46.21)     |
| 450  | 0.93       | 0.9(-2.9)   | 0.94(1.62)   | 0.6(-35.17)  | 0.51(-45.4)     |
| 500  | 0.93       | 0.9(-3.15)  | 0.95(1.92)   | 0.61(-34.18) | 0.51(-44.57)    |
